# Supplementary material for: Levetiracetam Therapeutic Drug Monitoring in a Large Cohort of Korean Epileptic Patients
Source: MDPI journal article supplement (doi:10.3390/ph14080826), 2021-08-22
Supplement: s1 [file s1]

## Supplementary Information

**Table S1.** Co-medication drugs of 519 patients.

| Medication                        | <i>n</i> (%) |
|-----------------------------------|--------------|
| Valproic acid                     | 156 (30.1)   |
| Oxcarbazepine                     | 151 (29.1)   |
| Clobazam                          | 136 (26.2)   |
| Lamotrigine                       | 89 (17.1)    |
| Topiramate                        | 78 (15.0)    |
| Carbamazepine                     | 74 (14.3)    |
| Zonisamide                        | 67 (12.9)    |
| Pregabalin                        | 46 (8.9)     |
| Clonazepam                        | 41 (7.9)     |
| Lacosamide                        | 40 (7.7)     |
| Phenobarbital                     | 34 (6.6)     |
| Phenytoin                         | 31 (6.0)     |
| Perampanel                        | 29 (5.6)     |
| Lorazepam                         | 11 (2.1)     |
| Alprazolam                        | 8 (1.5)      |
| Diazepam                          | 6 (1.2)      |
| Midazolam                         | 3 (0.6)      |
| Rufinamide                        | 3 (0.6)      |
| Etizolam                          | 2 (0.4)      |
| Gabapentin                        | 2 (0.4)      |
| Vigabatrin                        | 2 (0.4)      |
| Ethosuximide                      | 1 (0.2)      |
| Others                            |              |
| Antidepressant                    | 24 (4.6)     |
| Alzheimer/Parkinsonism medication | 13 (2.5)     |
| Antipsychotics                    | 12 (2.3)     |
| Miscellaneous                     | 21 (4.0)     |
